# Supplementary material for: T&C-CROP: representing mechanistic crop growth with a terrestrial biosphere model (T&C, v1.5) – model formulation and validation
Source: Copernicus journal article supplement (doi:10.5194/gmd-18-1287-2025), 2025-03-03
Supplement: Supplementary file 1 [file gmd-18-1287-2025-supplement.zip]

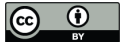

*Supplement of*

## **T&C-CROP: representing mechanistic crop growth with a terrestrial biosphere model (T&C, v1.5) – model formulation and validation**

**Jordi Buckley Paules et al.**

*Correspondence to:* Jordi Buckley Paules ([j.buckley21@ic.ac.uk](mailto:j.buckley21@ic.ac.uk))

- [gmd-18-1287-2025-supplement-title-page.pdf](#)
- [Supplementary 1.pdf](#)
- [Supplementary 2.xlsx](#)

The copyright of individual parts of the supplement might differ from the article licence.
