# Supplementary material for: T&C-CROP: representing mechanistic crop growth with a terrestrial biosphere model (T&C, v1.5) – model formulation and validation
Source: Copernicus journal article supplement (doi:10.5194/gmd-18-1287-2025), 2025-03-03
Supplement: Supplementary file 1 [file gmd-18-1287-2025-supplement.zip]

## Sheet: BELON
			BELON
			Sugar Beet	Winter Wheat	Potatoes	Mustard	Maize	Oat
Sl	m2 / gC	Specific leaf area	0.028	0.025	0.023	0.04	0.024	0.027
age_cr	day	Critical Leaf Age	95	90	45	85	120	90
Tlo	Celsius	Temperature for leaf onset	13.5	2	13.4	9	17	3.5
dmg	day	Days of Max Growth	65	75	110	60	50	50
Trr	gC / m2 d	Translocation rate	8.5	7.5	6.9	6.5	8.5	6.5
LDay_min	-	Minimum Day duration for leaf onset	12.5	12.3	12.3	10.2	11.1	10.2
VCmAX	μmol CO2/ m2 s]	Maximum Rubisco capacity at 25°C leaf level	88	106	65	35	45	54
Bfac	-	Leaf onset water stress threshold	0.95	0.95	0.95	0.95	0.95	0.95
ase	C3/C4	Photosynthesis type	3	3	3	3	4	3
Ldaycrit		Threshold for senescence (hours of daylight)	5	7.7	7	7	9	10
ff_r	-	Fraction of biomass allocated to fruit	0.5	0.4	0.5	0.5	0.52	0.5
Sl_emecrop	-	Additional SLA at emergence.	0.01	0.022	0.021	0.011	0.015	0.001
so_crop	-	Fraction of biomass allocated to stem	0.1	0.1	0	0.05	0.05	0.05
Max_height	m	Maximum crop height	1.2	1.2	0.7	1.2	3	1.2

## Sheet: CHOE2
			CHOE2
			Wheat	Barley	Grass	Potatoes	Rape Seed	Peas
Sl	m2 / gC	Specific leaf area	0.03	0.032	0.04	0.024	0.03	0.029
age_cr	day	Critical Leaf Age	95	90	110	100	85	58
Tlo	Celsius	Temperature for leaf onset	5.5	4	5	7	6.7	7.5
dmg	day	Days of Max Growth	70	60	65	70	45	30
Trr	gC / m2 d	Translocation rate	6.5	6.5	6.5	6.5	6.5	6.5
LDay_min	-	Minimum Day duration for leaf onset	10	10.5	4	10	7.2	9
VCmAX	μmol CO2/ m2 s]	Maximum Rubisco capacity at 25°C leaf level	120	120	70	75	118	50
Bfac	-	Leaf onset water stress threshold	0.99	0.99	0.99	0.99	0.99	0.99
ase	C3/C4	Photosynthesis type	3	3	3	3	3	3
Ldaycrit		Threshold for senescence (hours of daylight)	13	11	12	12.4	12	12
ff_r	-	Fraction of biomass allocated to fruit	0.5	0.5	0.5	0.5	0.5	0.6
Sl_emecrop	-	Additional SLA at emergence.	0.015	0.018	0.02	0.015	0.025	0.005
so_crop	-	Fraction of biomass allocated to stem	0.1	0.1	0.1	0.1	0.1	0.1
Max_height	m	Maximum crop height	1.2	1.2	0.7	0.8	1.2	0.7

## Sheet: USNE1
Parameter	UNIT	DESCRIPTION	Maize USNE1
Sl	m2 / gC	Specific leaf area	0.036
age_cr	day	Critical Leaf Age	60
Tlo	Celsius	Temperature for leaf onset	18
dmg	day	Days of Max Growth	20
Trr	gC / m2 d	Translocation rate	8.5
LDay_min	-	Minimum Day duration for leaf onset	14.3
VCmAX	μmol CO2/ m2 s]	Maximum Rubisco capacity at 25°C leaf level	50
Bfac	-	Leaf onset water stress threshold	0.99
ase	C3/C4	Photosynthesis type
Ldaycrit		Threshold for senescence (hours of daylight)	13.8
ff_r	-	Fraction of biomass allocated to fruit	0.3
Sl_emecrop	-	Additional SLA at emergence.	0.015
so_crop	-	Fraction of biomass allocated to stem	0.05
Max_height	m	Maximum crop height	2.5

## Sheet: CHCHA
Parameter	UNIT	DESCRIPTION	GRASS
Sl	m2 / gC	Specific leaf area	0.035
age_cr	day	Critical Leaf Age	180
Tlo	Celsius	Temperature for leaf onset	0
dmg	day	Days of Max Growth	20
Trr	gC / m2 d	Translocation rate	2
LDay_min	-	Minimum Day duration for leaf onset	9.7
VCmAX	μmol CO2/ m2 s]	Maximum Rubisco capacity at 25°C leaf level	96
Bfac	-	Leaf onset water stress threshold	0.99
ase	C3/C4	Photosynthesis type	3
Ldaycrit		Threshold for senescence (hours of daylight)	10.7
ff_r	-	Fraction of biomass allocated to fruit	0.1
Sl_emecrop	-	Additional SLA at emergence.	NA
so_crop	-	Fraction of biomass allocated to stem	NA
Max_height	m	Maximum crop height	NA

## Sheet: ALL
			BELON						CHOE2						CHCHA	USNE1
			Sugar Beet	Wheat	Potatoes	Mustard	Maize	Oat	Wheat	Barley	Grass	Potatoes	Rape Seed	Peas	Grass	Maize
Sl	m2 / gC	Specific leaf area	0.028	0.025	0.023	0.04	0.024	0.027	0.03	0.032	0.04	0.024	0.03	0.029	0.035	0.036
age_cr	day	Critical Leaf Age	95	90	45	85	120	90	95	90	110	100	85	58	180	60
Tlo	Celsius	Temperature for leaf onset	13.5	2	13.4	9	17	3.5	5.5	4	5	7	6.7	7.5	1	18
dmg	day	Days of Max Growth	65	75	110	60	50	50	70	60	65	70	45	30	20	20
Trr	gC / m2 d	Translocation rate	8.5	7.5	6.9	6.5	8.5	6.5	6.5	6.5	6.5	6.5	6.5	6.5	2	8.5
LDay_min	-	Minimum Day duration for leaf onset	12.5	12.3	12.3	10.2	11.1	10.2	10	10.5	4	10	7.2	9	9.7	14.3
VcMAX	μmol CO2/ m2 s]	Maximum Rubisco capacity at 25°C leaf level	88	106	65	35	45	54	120	120	70	75	118	50	96	50
Bfac	-	Leaf onset water stress threshold	0.95	0.95	0.95	0.95	0.95	0.95	0.99	0.99	0.99	0.99	0.99	0.99	0.99	0.99
ase	C3/C4	Photosynthesis type	3	3	3	3	4	3	3	3	3	3	3	3	3	4
Ldaycrit		Threshold for senescence (hours of daylight)	5	7.7	7	7	9	10	13	11	12	12.4	12	12	10.7	13.8
ff_r	-	Fraction of biomass allocated to fruit	0.5	0.4	0.5	0.5	0.52	0.5	0.5	0.5	0.5	0.5	0.5	0.6	0.1	0.3
Sl_emecrop	-	Additional SLA at emergence.	0.01	0.022	0.021	0.011	0.015	0.001	0.015	0.018	0.02	0.015	0.025	0.005	NA	0.015
so_crop	-	Fraction of biomass allocated to stem	0.1	0.1	0	0.05	0.05	0.05	0.1	0.1	0.1	0.1	0.1	0.1	NA	0.05
Max_height	m	Maximum crop height	1.2	1.2	0.7	1.2	3	1.2	1.2	1.2	0.7	0.8	1.2	0.7	NA	2.5
