# Supplementary material for: T&C-CROP: representing mechanistic crop growth with a terrestrial biosphere model (T&C, v1.5) – model formulation and validation
Source: Copernicus journal article supplement (doi:10.5194/gmd-18-1287-2025), 2025-03-03
Supplement: Supplementary file 2 [file gmd-18-1287-2025-supplement.zip]

## Section S1: Leaf Turnover Modification

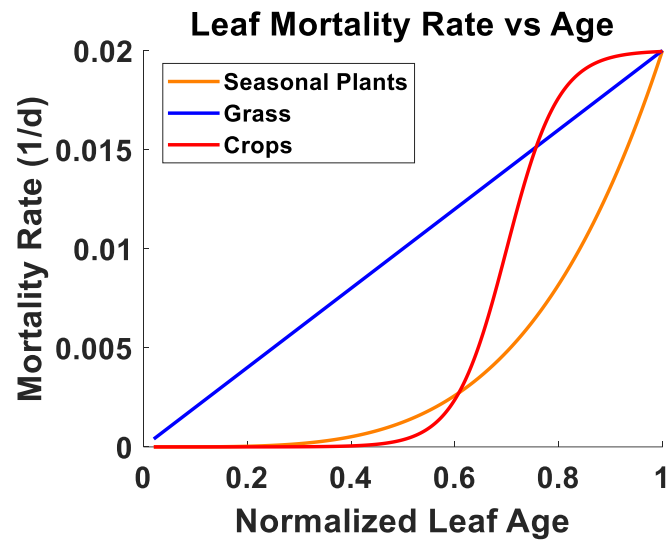

**Figure S1** Our modification, in the form of a sigmoidal function, ensures that the majority of leaf turnover occurs as leaf age approaches the critical age, rather than in the early phases, which is more realistic for crops.

## **Section S2: Crop Parameters**

This is attached as Supplementary 2 which is an Excel Spreadsheet.

## Section S3: Crop Planting and Harvest Dates

|               |                  |            |            |               |                 |            |            |
|---------------|------------------|------------|------------|---------------|-----------------|------------|------------|
| <b>BE-LON</b> | Sugar Beet       | 30/03/2004 | 29/09/2004 | <b>CH-OE2</b> | Winter Barley   | 29/09/2004 | 14/07/2005 |
|               | Winter Wheat     | 14/10/2004 | 03/08/2005 |               | Cover crop      | 09/08/2005 |            |
|               | Potatoes         | 01/05/2006 | 19/09/2006 |               | Potato          | 05/05/2006 |            |
|               | Winter Wheat     | 13/10/2006 | 05/08/2007 |               | Winter Wheat    | 19/10/2006 | 15/07/2007 |
|               | Sugar Beet       | 22/04/2008 | 04/11/2008 |               | Winter Rapeseed | 28/08/2007 | 16/07/2008 |
|               | Winter Wheat     | 13/11/2008 | 07/08/2009 |               | Winter Wheat    | 07/10/2008 | 21/07/2009 |
|               | Mustard          | 01/09/2009 | 01/12/2009 |               | Cover crop      | 12/08/2009 |            |
|               | Potatoes         | 24/04/2010 | 03/09/2010 |               | Peas            | 09/05/2010 | 19/07/2010 |
|               | Winter Wheat     | 13/10/2010 | 16/08/2011 |               | Winter Wheat    | 15/10/2010 | 02/08/2011 |
|               | Maize            | 14/05/2012 | 13/10/2012 |               | Winter Barley   | 24/09/2011 | 09/07/2012 |
|               | Winter Wheat     | 25/10/2012 | 12/08/2013 |               | Winter Rapeseed | 04/09/2012 | 28/07/2013 |
|               | Mustard          | 05/09/2013 | 15/11/2013 |               | Winter Wheat    | 19/10/2013 | 24/07/2014 |
|               | Potatoes         | 05/04/2014 | 21/08/2014 |               | Winter Barley   | 29/09/2014 | 04/07/2015 |
|               | Winter Wheat     | 14/10/2014 | 02/08/2015 |               | Cover crop      | 03/08/2015 |            |
|               | Mustard          | 21/08/2015 | 07/12/2015 |               | Peas            | 09/05/2016 | 25/07/2016 |
|               | Sugar Beet       | 12/04/2016 | 27/10/2016 |               | Winter Wheat    | 12/10/2016 | 19/07/2017 |
|               | Winter Wheat     | 29/10/2016 | 29/07/2017 |               | Winter Rapeseed | 30/08/2017 | 12/07/2018 |
|               | Mustard          | 06/09/2017 | 06/12/2017 |               | Winter Wheat    | 11/10/2018 | 19/07/2019 |
|               | Potatoes         | 22/04/2018 | 11/09/2018 |               | Winter Barley   | 04/10/2019 | 01/07/2020 |
|               | Winter Wheat     | 10/10/2018 | 01/08/2019 |               | Grass           | 03/04/2020 | 19/10/2020 |
| <b>US-NE1</b> | Oat/Faba Bean    | 09/08/2019 | 04/12/2019 | <b>US-NE1</b> | Maize           | 01/04/2020 | 09/11/2009 |
|               | Sugar Beet       | 01/04/2020 | 12/11/2020 |               | Maize           | 01/04/2019 | 21/09/2010 |
|               | Spinach          | 01/04/2021 | 09/06/2021 |               | Maize           | 01/05/2018 | 26/10/2011 |
|               | Green Dwarf Bean | 22/07/2021 | 24/10/2021 |               | Maize           | 01/04/2024 | 10/10/2012 |
|               | Maize            | 01/05/2010 | 18/10/2001 |               | Maize           | 01/04/2029 | 22/10/2013 |
|               | Maize            | 01/05/2009 | 04/11/2002 |               | Maize           | 01/04/2021 | 28/10/2014 |
|               | Maize            | 01/05/2015 | 27/10/2003 |               | Maize           | 01/04/1930 | 26/10/2015 |
|               | Maize            | 01/05/2003 | 15/10/2004 |               | Maize           | 01/05/2019 | 22/09/2016 |
|               | Maize            | 01/05/2004 | 15/10/2005 |               | Maize           | 01/04/2027 | 25/10/2017 |
|               | Maize            | 01/05/2005 | 05/10/2006 |               | Maize           | 01/05/2008 | 31/10/2018 |
| <b>US-NE1</b> | Maize            | 01/05/2001 | 05/11/2007 | <b>US-NE1</b> | Maize           | 01/04/2019 | 04/11/2019 |
|               | Maize            | 01/04/2029 | 18/11/2008 |               | Maize           | 01/04/2020 | 17/09/2020 |

**Table S1** Illustrating planting and harvest dates for the different crops.

## Section S4: Fertilizer Applications CHOE2

| CHOE2 Recorded Fertilizer Applications |                        |                       |                       |            |                        |                       |                       |
|----------------------------------------|------------------------|-----------------------|-----------------------|------------|------------------------|-----------------------|-----------------------|
| Date                                   | N (g m <sup>-2</sup> ) | P(g m <sup>-2</sup> ) | K(g m <sup>-2</sup> ) | Date       | N (g m <sup>-2</sup> ) | P(g m <sup>-2</sup> ) | K(g m <sup>-2</sup> ) |
| 15.04.2004                             | 4                      | 0.00                  | 0.00                  | 01.04.2011 | 5                      | 0.00                  | 0.00                  |
| 03.05.2004                             | 4                      | 0.70                  | 1.33                  | 02.04.2011 | 4                      | 0.70                  | 1.33                  |
| 07.06.2004                             | 2.5                    | 0.00                  | 0.00                  | 02.08.2011 | 3.75                   | 0.00                  | 0.00                  |
| 04.08.2004                             | 2.2                    | 0.00                  | 0.00                  | 03.04.2012 | 4                      | 0.00                  | 0.00                  |
| 14.04.2005                             | 4                      | 0.00                  | 0.00                  | 28.04.2012 | 2                      | 0.35                  | 0.67                  |
| 13.05.2005                             | 2                      | 0.35                  | 0.67                  | 04.09.2012 | 0                      | 2.27                  | 8.33                  |
| 14.07.2005                             | 4.05                   | 0.00                  | 0.00                  | 05.04.2013 | 8.1                    | 0.00                  | 0.00                  |
| 01.05.2006                             | 7.69                   | 2.52                  | 8.03                  | 18.04.2013 | 6.3                    | 0.22                  | 0.00                  |
| 05.05.2006                             | 4.2                    | 2.10                  | 12.00                 | 30.03.2014 | 5                      | 0.00                  | 0.00                  |
| 05.05.2006                             | 0                      | 0.00                  | 16.67                 | 17.05.2014 | 4                      | 0.70                  | 1.33                  |
| 01.06.2006                             | 8.4                    | 0.00                  | 0.00                  | 24.07.2014 | 4.4                    | 0.00                  | 0.00                  |
| 18.10.2006                             | 3.15                   | 0.00                  | 0.00                  | 12.09.2014 | 0                      | 2.01                  | 8.33                  |
| 15.03.2007                             | 5                      | 0.00                  | 0.00                  | 10.04.2015 | 5                      | 0.00                  | 0.00                  |
| 27.05.2007                             | 4                      | 0.70                  | 1.33                  | 23.04.2015 | 4                      | 0.70                  | 1.33                  |
| 15.07.2007                             | 5                      | 0.00                  | 0.00                  | 04.07.2015 | 2.5                    | 0.00                  | 0.00                  |
| 28.08.2007                             | 0                      | 0.00                  | 0.00                  | 18.03.2016 | 11.93                  | 3.91                  | 12.45                 |
| 28.08.2007                             | 0                      | 0.00                  | 0.00                  | 27.03.2017 | 5.5                    | 0.00                  | 0.00                  |
| 02.09.2007                             | 0.5                    | 0.57                  | 2.08                  | 02.04.2017 | 4.7109                 | 0.54                  | 5.62                  |
| 17.04.2008                             | 2.7                    | 0.00                  | 0.00                  | 27.05.2017 | 2.5                    | 0.00                  | 0.00                  |
| 18.03.2009                             | 0                      | 0.96                  | 5.50                  | 19.07.2017 | 2.7                    | 0.00                  | 0.00                  |
| 02.04.2009                             | 3.75                   | 0.00                  | 0.00                  | 29.08.2017 | 1                      | 0.87                  | 4.17                  |
| 20.05.2009                             | 4                      | 0.70                  | 1.33                  | 28.02.2018 | 2.7                    | 2.01                  | 5.00                  |
| 21.07.2009                             | 3.85                   | 0.00                  | 0.00                  | 09.04.2018 | 8.1                    | 0.00                  | 0.00                  |
| 12.08.2009                             | 3.43                   | 3.65                  | 6.88                  | 09.04.2018 | 6.3                    | 0.22                  | 0.00                  |
| 27.03.2010                             | 4                      | 4.00                  | 4.00                  | 09.10.2018 | 0.5                    | 0.44                  | 2.08                  |
| 06.05.2010                             | 0                      | 0.00                  | 0.00                  | 11.10.2018 | 0                      | 1.75                  | 5.00                  |
| 09.05.2010                             | 5.96                   | 1.96                  | 6.23                  | 01.04.2019 | 5                      | 0.00                  | 0.00                  |
| 04.06.2010                             | 0                      | 3.01                  | 7.50                  | 24.05.2019 | 4                      | 0.00                  | 0.00                  |
| 15.03.2011                             | 3                      | 0.00                  | 0.00                  | 19.07.2019 | 4.6                    | 0.00                  | 0.00                  |

**Table S2** Illustrating fertilizer dates and quantities at site CHOE2.

## Section S5: Site Statistics

| USNE1 – MAIZE CONTINUOUS ROTATION                                              |                                                                        |                                                                         |
|--------------------------------------------------------------------------------|------------------------------------------------------------------------|-------------------------------------------------------------------------|
| <b>Yields (Annual)</b><br>R-squared: 0.01<br>RMSE: 2.98 [gC / m2]<br>IOA: 0.14 | <b>LAI DAILY</b><br>R-squared: 0.77<br>RMSE: 1.11<br>IOA: 0.93         | <b>GPP Daily</b><br>R-squared: 0.81<br>RMSE: 4.16<br>IOA: 0.94          |
| <b>Rn Monthly</b><br>R-squared: 0.98<br>RMSE: 12.95 [W/m2 ]<br>IOA: 0.99       | <b>H Monthly</b><br>R-squared: 0.70<br>RMSE: 9.73 [W/m2 ]<br>IOA: 0.90 | <b>QE Monthly</b><br>R-squared: 0.98<br>RMSE: 10.5 [W/m2 ]<br>IOA: 0.99 |
| <b>Rn HOURLY</b><br>R-squared: 0.99<br>RMSE: 13.51 [W/m2 ]<br>IOA: 0.99        | <b>H HOURLY</b><br>R-squared: 0.93<br>RMSE: 20.60 [W/m2 ]<br>IOA: 0.92 | <b>QE HOURLY</b><br>R-squared: 0.99<br>RMSE: 4.98 [W/m2 ]<br>IOA: 0.99  |
| CHCHA – GRASS                                                                  |                                                                        |                                                                         |
| <b>Yields (Annual)</b><br>R-squared: 0.89<br>RMSE: 0.56<br>IOA: 0.97           | <b>LAI DAILY</b><br>R-squared: 0.3666<br>RMSE: 1.3896<br>IOA: 0.7598   | <b>GPP Daily</b><br>R-squared: 0.4672<br>RMSE: 4.6963<br>IOA: 0.8097    |
| <b>Rn Monthly</b><br>R-squared: 0.9989<br>RMSE: 10.8123<br>IOA: 0.9899         | <b>H Monthly</b><br>R-squared: 0.9576<br>RMSE: 12.4517<br>IOA: 0.7558  | <b>QE Monthly</b><br>R-squared: 0.9851<br>RMSE: 9.8401<br>IOA: 0.9832   |
| <b>Rn HOURLY</b><br>R-squared: 0.9857<br>RMSE: 16.8752<br>IOA: 0.9951          | <b>H HOURLY</b><br>R-squared: 0.8241<br>RMSE: 14.4625<br>IOA: 0.9022   | <b>QE HOURLY</b><br>R-squared: 0.9654<br>RMSE: 13.6610<br>IOA: 0.9862   |
| BELON – CROP ROTATION                                                          |                                                                        |                                                                         |
| <b>Yields (Annual)</b><br>R-squared: 0.52<br>RMSE: 1.98<br>IOA: 0.66           | <b>LAI DAILY</b><br>R-squared: 0.3267<br>RMSE: 1.4596<br>IOA: 0.7345   | <b>GPP Daily</b><br>R-squared: 0.59<br>RMSE: 5.1289<br>IOA: 0.7713      |
| <b>Rn Monthly</b><br>R-squared: 0.9668<br>RMSE: 10.6468<br>IOA: 0.9882         | <b>H Monthly</b><br>R-squared: 0.6534<br>RMSE: 15.8937<br>IOA: 0.7371  | <b>QE Monthly</b><br>R-squared: 0.9505<br>RMSE: 21.3993<br>IOA: 0.8779  |
| <b>Rn HOURLY</b><br>R-squared: 0.9988<br>RMSE: 8.5020<br>IOA: 0.9984           | <b>H HOURLY</b><br>R-squared: 0.9748<br>RMSE: 14.4316<br>IOA: 0.9371   | <b>QE HOURLY</b><br>R-squared: 0.9949<br>RMSE: 11.6733<br>IOA: 0.9729   |
| CHOE2 – CROP ROTATION                                                          |                                                                        |                                                                         |
| <b>Yields (Annual)</b><br>R-squared: 0.89<br>RMSE: 0.56<br>IOA: 0.97           | <b>LAI DAILY</b><br>R-squared: 0.2604<br>RMSE: 1.0635<br>IOA: 0.7040   | <b>GPP Daily</b><br>R-squared: 0.5153<br>RMSE: 3.9298<br>IOA: 0.8375    |
| <b>Rn Monthly</b><br>NA site data                                              | <b>H Monthly</b><br>R-squared: 0.6862<br>RMSE: 19.6352<br>IOA: 0.7063  | <b>QE Monthly</b><br>R-squared: 0.9455<br>RMSE: 19.0611<br>IOA: 0.9176  |
| <b>Rn HOURLY</b><br>NA site data                                               | <b>H HOURLY</b><br>R-squared: 0.9026<br>RMSE: 18.1636<br>IOA: 0.9124   | <b>QE HOURLY</b><br>R-squared: 0.9967<br>RMSE: 23.2496<br>IOA: 0.9162   |

**Table S3** Illustrating model validation statistics across sites.

## Section S6: Site Statistics

| Yields: USNE1 |            |            |              |
|---------------|------------|------------|--------------|
| Year          | MODGRAIN   | OBSGRAIN   | $\Delta$ (%) |
| 2002          | 4.2        | 5.6        | 24.6         |
| 2003          | 4.5        | 5.2        | 13.8         |
| 2004          | 4.6        | 5.3        | 14.1         |
| 2005          | 4.7        | 5.2        | 10.5         |
| 2006          | 4.4        | 4.5        | 2.8          |
| 2007          | 4.2        | 5.5        | 23.6         |
| 2008          | 4.2        | 5.2        | 18.7         |
| 2009          | 4.6        | 5.8        | 20.4         |
| 2010          | -          | -          | -            |
| 2011          | 4.2        | 5.2        | 18.1         |
| 2012          | 5.6        | 5.6        | 0.2          |
| <b>AVG</b>    | <b>4.5</b> | <b>5.3</b> | <b>14.7</b>  |

**Table S4** Modelled Grain and Observed Grain yields at USNE1 site, the delta  $\Delta$  (%) refers to percentage difference.

| Yields: CHOE2    |         |         |              |           |           |                  |            |            |                  |
|------------------|---------|---------|--------------|-----------|-----------|------------------|------------|------------|------------------|
| CROP             | OBS AGB | MOD AGB | $\Delta$ (%) | OBS STRAW | MOD STRAW | $\Delta$ (%)     | OBS GRAIN  | MOD GRAIN  | $\Delta$ (%)     |
| Wheat (2004)     | 4.5     | 3.7     | <b>17.1</b>  | 1.6       | 1.3       | <b>17.8</b>      | 2.9        | 2.4        | <b>15.7</b>      |
| Barley (2005)    | 4.0     | 3.5     | <b>13.4</b>  | 0.7       | 1.2       | -<br><b>79.9</b> | 3.3        | 2.2        | <b>32.5</b>      |
| Wheat (2007)     | 4.0     | 2.4     | <b>39.0</b>  | 1.7       | 0.9       | <b>47.5</b>      | 2.3        | 1.6        | <b>30.0</b>      |
| Rape Seed (2008) | NaN     | 3.7     |              | NaN       | NaN       |                  | 1.8        | 2.1        | -<br><b>16.6</b> |
| Wheat (2009)     | 4.1     | 3.4     | <b>17.1</b>  | 1.4       | 1.2       | <b>14.2</b>      | 2.6        | 2.2        | <b>18.1</b>      |
| Peas (2010)      | 0.4     | NaN     |              | NaN       | NaN       |                  | <b>0.4</b> | <b>0.7</b> |                  |
| Wheat (2011)     | 4.2     | 4.3     | <b>-0.2</b>  | 1.5       | 1.6       | <b>-2.4</b>      | 2.7        | 2.7        | <b>-0.6</b>      |
| Bareley (2012)   | 4.0     | 4.3     | <b>-7.2</b>  | 0.8       | 1.4       | -<br><b>79.6</b> | 3.2        | 2.9        | <b>10.1</b>      |
| Rape Seed (2013) | NaN     | 4.1     |              | NaN       | NaN       |                  | 2.0        | 2.0        | <b>0.1</b>       |
| Wheat (2014)     | 4.5     | 3.2     | <b>28.5</b>  | 1.8       | 1.1       | <b>40.1</b>      | 2.8        | 2.2        | <b>18.9</b>      |
| Barley (2015)    | 3.8     | 3.9     | <b>-3.7</b>  | 0.6       | 1.1       | -<br><b>71.4</b> | 3.1        | 2.9        | <b>8.4</b>       |
| Wheat (2017)     | 4.1     | 4.4     | <b>-7.2</b>  | 1.6       | 1.8       | -<br><b>10.9</b> | 2.5        | 2.6        | <b>-5.1</b>      |
| Rape Seed (2018) | NaN     | 3.3     |              | NaN       | NaN       |                  | 2.3        | 2.4        | <b>-5.2</b>      |
| Wheat (2019)     | 4.6     | 4.3     | <b>5.1</b>   | 2.1       | 1.6       | <b>26.1</b>      | 2.5        | 2.8        | -<br><b>14.0</b> |

**Table S5** Modelled vs Observed yields across different crops at the CHOE2 site, the delta  $\Delta$  (%) refers to percentage difference.

| Yields: BELON                  |          |            |            |              |              |              |              |              |              |              |
|--------------------------------|----------|------------|------------|--------------|--------------|--------------|--------------|--------------|--------------|--------------|
| CROP                           | YEA<br>R | OBS<br>AGB | MOD<br>AGB | $\Delta$ (%) | OBS<br>Grain | MOD<br>Grain | $\Delta$ (%) | OBS<br>Straw | MOD<br>straw | $\Delta$ (%) |
| Sugar Beet                     | 2004     | 7.82       | 6.75       | 15           | NaN          | 3.89         |              | NaN          | 2.85         |              |
| 'Winter wheat (cv. Dekan)'     | 2005     | 5.68       | 5.97       | -5           | 3.97         | 3.62         | 9            | 1.71         | 2.37         | -28          |
| 'Potato (cv. Spunta)'          | 2006     | 2.93       | 2.24       | 30           | NaN          | 0.37         | NaN          | NaN          | 1.87         | NaN          |
| 'Winter wheat (cv. Rosario)'   | 2007     | 4.56       | 5.98       | -23          | 3.16         | 3.42         | -7           | 1.39         | 2.62         | -46          |
| 'Sugar beet (cv. Calgahri)'    | 2008     | 9.89       | 7.42       | 33           | NaN          | 4.49         | NaN          | NaN          | 2.98         | NaN          |
| 'Winter wheat (cv. Ararat)'    | 2009     | 5.37       | 6.28       | -14          | 3.84         | 3.79         | 1            | 1.52         | 2.55         | -40          |
| 'Potato (cv. Draga)'           | 2010     | 3.05       | 2.42       | 26           | NaN          | 0.429        | NaN          | NaN          | 1.99         | NaN          |
| 'Winter wheat (cv. Sahara)'    | 2011     | 5.49       | 5.68       | -3           | 3.69         | 3.11         | 18           | 1.79         | 2.63         | -32          |
| 'Maize'                        | 2012     | 7.76       | 7.24       | 7            | 4.15         | 4.15         | 0            | 3.59         | 4.15         | -13          |
| 'Winter wheat (cv. Matrix)'    | 2013     | 5.98       | 5.33       | 12           | 3.86         | 3.20         | 20           | 2.11         | 2.18         | -3           |
| 'Potato (cv. Draga)'           | 2014     | 3.2        | 1.86       | 71           | NaN          | 0.24         | NaN          | NaN          | 1.61         | NaN          |
| 'Winter wheat (cv. Sahara)'    | 2015     | 5.36       | 6.18       | -13          | 3.55         | 3.68         | -3           | 1.80         | 2.53         | -28          |
| 'Sugar beet (cv. Lisanna KWS)' | 2016     | 9.04       | 6.67       | 35           | NaN          | 4.06         | NaN          | NaN          | 2.61         | NaN          |
| 'Winter wheat (cv. Tobak)'     | 2017     | 4.99       | 5.82       | -14          | 3.64         | 3.29         | 10           | 1.34         | 2.55         | -47          |
| 'Potato (cv. Agria)'           | 2018     | 4.11       | 2.19       | 87           | NaN          | 0.37         | NaN          | NaN          | 1.81         | NaN          |
| 'Winter wheat (cv. Smart)'     | 2019     | 6.78       | 5.95       | 13           | 4.09         | 3.56         | 14           | 2.67         | 2.42         | 10           |

**Table S6** Modelled vs Observed yields across different crops at the BELON site, the delta  $\Delta$  (%) refers to percentage difference.

| CHCHA        |          |           |           |              |
|--------------|----------|-----------|-----------|--------------|
| Cut Date     | CkgPerHa | OBS TC ha | MOD TC ha | $\Delta$ (%) |
| '29/06/2010' | 728.68   | 1.03      | 1.02      | -0.01        |
| '22/08/2010' | 1026.80  | 0.73      | 0.86      | 0.15         |
| '12/10/2010' | 728.33   | 1.03      | 1.19      | 0.13         |
| '19/04/2011' | 1030.76  | 0.82      | 1.25      | 0.34         |
| '15/06/2011' | 824.19   | 0.79      | 1.08      | 0.27         |
| '12/07/2011' | 789.69   | 0.95      | 1.19      | 0.20         |
| '24/08/2011' | 945.38   | 0.76      | 0.53      | -0.42        |
| '28/09/2011' | 759.57   | 0.85      | 0.99      | 0.14         |

**Table S7** Modelled vs Observed yields across different crops at the CHCHA site, the delta  $\Delta$  (%) refers to percentage difference.

## Section S7: Soil Biogeochemistry

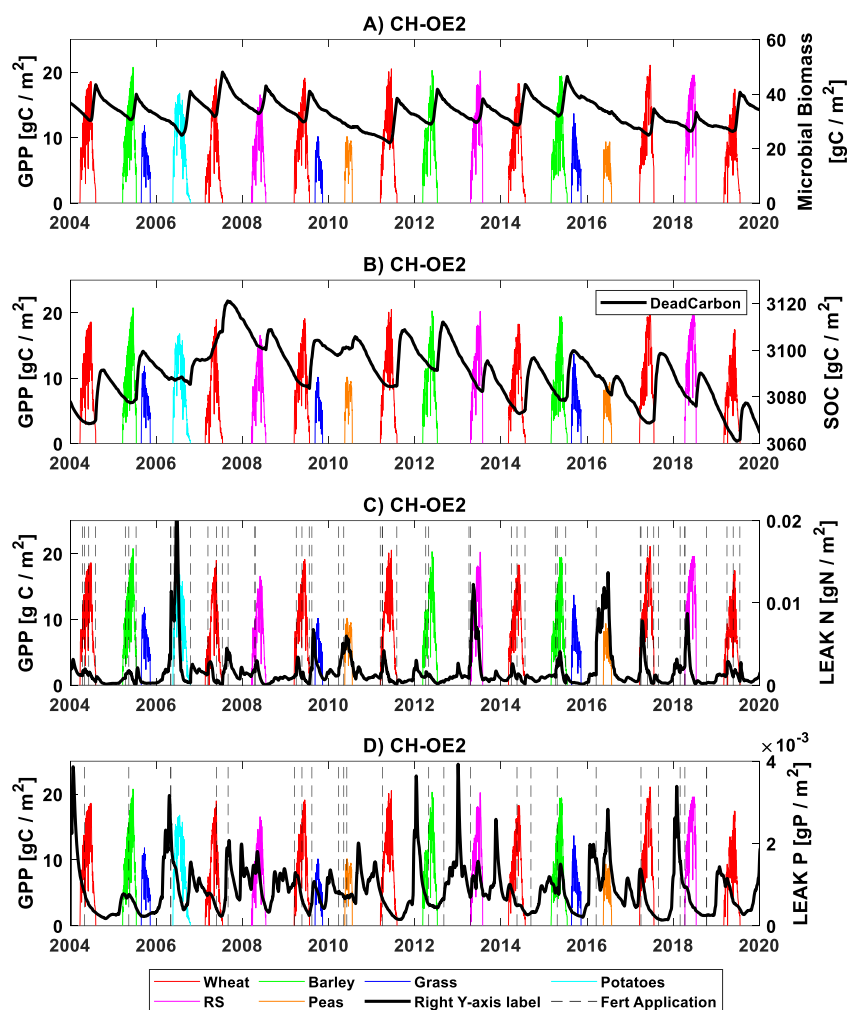

**Figure S2** Illustrating simulated soil biogeochemistry.
